# Supplementary material for: Interactive visualization and interpretation of pangenome graphs by linear reference–based coordinate projection and annotation integration
Source: HighWire-hosted journal article supplement (doi:10.1101/gr.279461.124), 2025-01-13
Supplement: Supplemental_Table.docx [file Supplemental_Table.docx]

**Supplemental Tables**

**Table S1. Software dependencies for VRPG.**

| Dependency | Tested version1 | URL | Installation note2 |
| --- | --- | --- | --- |
| bash | 4.4.19 | https://www.gnu.org/software/bash/ | Likely preinstalled |
| bootstrap | 4.3.1 | https://github.com/twbs/bootstrap | Install via VRPG’s script |
| d3 | 6.7.0 | https://github.com/d3/d3 | Install via VRPG’s script |
| django | 3.2.4 | https://github.com/django/django | Install via pip |
| FileSaver | 2.0.4 | https://github.com/eligrey/FileSaver.js | Install via VRPG’s script |
| floating-ui | 1.15.0 | https://github.com/floating-ui/floating-ui | Install via VRPG’s script |
| g++ | 9.2.1 | https://gcc.gnu.org/ | Likely preinstalled |
| gcc | 9.2.1 | https://gcc.gnu.org/ | Likely preinstalled |
| git | 2.27.0 | https://git-scm.com/ | Likely preinstalled |
| gzip | 1.9 | https://www.gnu.org/software/gzip/ | Likely preinstalled |
| jquery | 3.2.1 | https://code.jquery.com | Install via VRPG’s script |
| lodash | 4.17.10 | https://github.com/lodash/lodash | Install via VRPG’s script |
| make | 4.2.1 | https://www.gnu.org/software/make/ | Likely preinstalled |
| minigraph | 0.19;0.20 | https://github.com/lh3/minigraph | Install by following VRPG’s GitHub tutorial |
| python | 3.8.12 | https://www.python.org/ | Likely preinstalled |
| pip | 21.2.4 | https://pypi.org/project/pip/ | Likely preinstalled |
| pybind11 | 2.10.3 | https://github.com/pybind/pybind11 | Install via pip |
| wget | 1.19.5 | https://www.gnu.org/software/wget/ | Likely preinstalled |
| zlib | 1.2.11 | https://zlib.net/ | Likely preinstalled |
| zlib-devel | 1.2.11 | https://zlib.net/ | Likely preinstalled |

Footnotes:

1. Our tested versions are listed here for the reference. An older/newer version from a reasonably modern Linux-based operating system should still work in most cases.
2. “Likely preinstalled”: likely preinstalled with most Linux-based operating system; “Install via pip”: install by typing ‘pip install <dependency>’ in the command line; “Install via VRPG’s installation script”: install by typing ‘python create.local.py && sh host.jslib.local.sh local’ in the command line; “Install by following VRPG’s GitHub tutorial”: install by follow the Installation section” on VRPG’s GitHub page (https://github.com/codeatcg/VRPG).
